# Supplementary material for: Successive light-induced two electron transfers in a Ru–Fe supramolecular assembly: from Ru–Fe(ii)–OH2to Ru–Fe(iv)–oxo
Source: Royal Society of Chemistry journal article supplement (doi:10.1039/c5sc00024f), 2015-01-01
Supplement: c5sc00024f1.pdf [file c5sc00024f1.pdf]

*Supplementary Information for*

**Successive Light Induced Two Electron Transfers in a Ru-Fe  
Supramolecular Assembly : from Ru-Fe(II)-OH<sub>2</sub> to Ru-Fe(IV)-Oxo.**

Christian Herrero, Annamaria Quaranta, Marie Sircoglou, Katell Sénéchal-David, Aurélie Baron, Irene Mustieles Marín, Charlotte Buron, Jean-Pierre Baltaze, Winfried Leibl, Ally Aukauloo and Frédéric Banse

|                                                                                                                                                                                                                     |      |
|---------------------------------------------------------------------------------------------------------------------------------------------------------------------------------------------------------------------|------|
| <b>Experimental Section</b> (synthetic procedures and physical measurements)                                                                                                                                        | S-2  |
| <b>Figure SI 1.</b> Synthetic procedure for complex Ru-FeCl ( <b>1-Cl</b> ).                                                                                                                                        | S-2  |
| <b>Figure SI 2.</b> Numbering scheme for NMR analysis.                                                                                                                                                              | S-4  |
| <b>Figure SI 3.</b> <sup>1</sup> H NMR analysis                                                                                                                                                                     | S-4  |
| <b>Figure SI 4.</b> <sup>13</sup> C NMR analysis                                                                                                                                                                    | S-5  |
| <b>Figure SI 5.</b> Structure of reference compounds <b>2-X</b>                                                                                                                                                     | S-6  |
| <b>Figure SI 6.</b> UV/Vis absorption of complexes <b>1-Cl</b> and <b>2-Cl</b>                                                                                                                                      | S-7  |
| <b>Figure SI 7.</b> Cyclic voltammetry of compounds <b>2-Cl</b> , <b>2-CH<sub>3</sub>CN</b> and <b>2-OH<sub>2</sub></b> .                                                                                           | S-8  |
| <b>Figure SI 8.</b> Cyclic voltammetry of compounds <b>1-Cl</b> , <b>1-CH<sub>3</sub>CN</b> and <b>1-OH<sub>2</sub></b> .                                                                                           | S-8  |
| <b>Table SI 1.</b> Electrochemical data for complexes <b>1</b> and <b>2</b> .                                                                                                                                       | S-9  |
| <b>Figure SI 9.</b> UV/Vis absorption of complexes <b>1-OH<sub>2</sub></b> and <b>2-OH<sub>2</sub></b> in presence of 2 eq. H <sub>2</sub> O <sub>2</sub> .                                                         | S-9  |
| <b>Figure SI 10.</b> X-band EPR of complex <b>2-OH<sub>2</sub></b> after addition of 2 eq. H <sub>2</sub> O <sub>2</sub> .                                                                                          | S-10 |
| <b>Figure SI 11.</b> X-band EPR of a mixture of <b>1-OH<sub>2</sub></b> and [Co <sup>III</sup> (NH <sub>3</sub> ) <sub>5</sub> Cl] <sup>2+</sup> at different time intervals during illumination with 450 nm light. | S-10 |
| <b>Figure SI 12.</b> Flash photolysis experiments of Ru <sup>II</sup> -Fe <sup>III</sup> (OH) in presence of 20 mM methylviologen after 460 nm laser flash excitation.                                              | S-11 |
| <b>Figure SI 13.</b> UV/Vis of a solution containing 34 μM <b>1-OH<sub>2</sub></b> and 400 μM [Co <sup>III</sup> (NH <sub>3</sub> ) <sub>5</sub> Cl] <sup>2+</sup> before and after illumination with 450 nm light. | S-12 |
| <b>Figure SI 14.</b> Photocatalytic oxidation of triphenylphosphine by <b>1-OH<sub>2</sub></b> in the presence of [Co <sup>III</sup> (NH <sub>3</sub> ) <sub>5</sub> Cl] <sup>2+</sup> .                            | S-12 |
| <b>Figure SI 15.</b> MS of <sup>18</sup> O insertion in triphenylphosphine oxide                                                                                                                                    | S-13 |

## Experimental Section

Chemicals were purchased from Acros and used without further purification. All solvents except for dichloromethane, acetonitrile and methanol were purchased from Aldrich or VWR and were used as received. Dichloromethane and acetonitrile were distilled over CaH<sub>2</sub>, whereas methanol was distilled over Mg. NMR spectra were taken either on a Bruker AV 300 MHz or a Bruker 600 MHz spectrometer using the residual protonated solvent as internal standard. Chemical shifts ( $\delta$ ) are given in parts per million (ppm) and coupling constants (J) are reported in hertz (Hz). Splitting patterns are designated as singlet (s), doublet (d), triplet (t), doublet of doublet (dd), and doublet of doublet of doublet (ddd). Splitting patterns that could not be interpreted or easily visualized are designated as multiplet (m). Electro spray mass spectra were taken on a Thermo Scientific TSQ, or on a Bruker micrOTOFq in the positive mode of detection (ESI+).

### Synthetic procedure

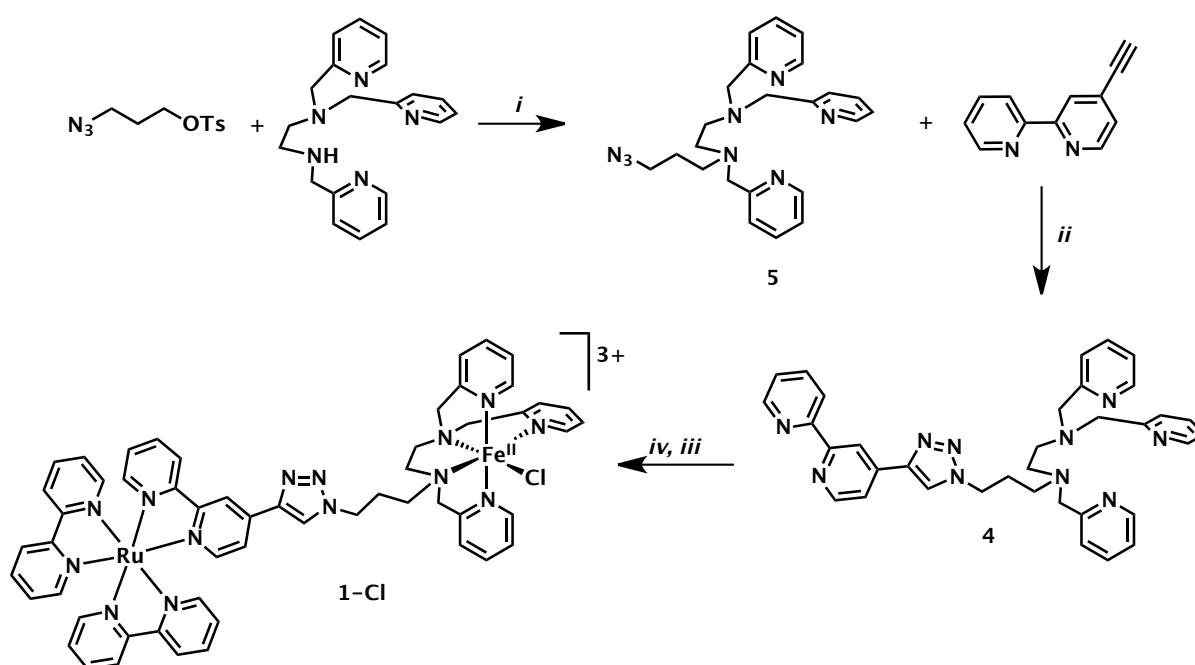

**Figure SI 1:** Synthetic procedure for complex Ru-FeCl (**1-Cl**). *i*) CH<sub>3</sub>CN, K<sub>2</sub>CO<sub>3</sub>, 90°C, 72 h *ii*) CuSO<sub>4</sub>·5H<sub>2</sub>O, Na ascorbate, CH<sub>2</sub>Cl<sub>2</sub>:H<sub>2</sub>O *iii*) Ru(bpy)<sub>2</sub>Cl<sub>2</sub>, AgNO<sub>3</sub>, MeOH, NaPF<sub>6</sub> *iv*) FeCl<sub>2</sub> CH<sub>3</sub>CN:MeOH.

**(5); step i.** *N,N,N'*-tris(2-pyridylmethyl)-ethane-1,2-diamine (Trispicen) (1.36 g, 4.09 mmol) and Toluene-4-sulfonic acid 3-azido-propane (1.40 g, 4.92 mmol, 1.2 eq) were dissolved in 100 mL acetonitrile. To this mixture were added K<sub>2</sub>CO<sub>3</sub> (5.7 g, 41 mmol, 10 eq) and KI (203 mg, 1.22 mmol, 0.30 eq) and the reaction was stirred at 90°C under an argon atmosphere for 72 hours. At this time the reaction mixture was allowed to cool to room temperature and filtered through a fritted filter in order to remove insoluble salts. The organic phase was removed under reduced atmosphere and the resulting solid was chromatographed using neutral alumina and CH<sub>2</sub>Cl<sub>2</sub>:1%MeOH as the eluent in order to collect the desired product. (437 mg, 26% yield). <sup>1</sup>H NMR (300 MHz, CDCl<sub>3</sub>)  $\delta$  8.47 (t, 3H, J = 5.6 Hz, Py-H); 7.59 (m, 3H, Py-H); 7.46 (d, 2H, J=7.7 Hz, Py-H); 7.29 (d, 1H, J=8.0 Hz, Py-H); 7.10 (m, 3H, Py-H); 3.80 (s, 4H, CH<sub>2</sub>-Py); 3.68 (s, 2H, CH<sub>2</sub>-Py); 3.19 (t, 2H, J = 7.0 Hz, CH<sub>2</sub>-N<sub>3</sub>); 2.69 (s, 4H, N-

CH<sub>2</sub>CH<sub>2</sub>-N); 2.49 (t, 2H, J = 7.0 Hz, CH<sub>2</sub>-N); 1.64 (q, 2H, J = 7.0 Hz, CH<sub>2</sub>-CH<sub>2</sub>-CH<sub>2</sub>). HRMS (ESI<sup>+</sup>) [M+H]<sup>+</sup> = 417.2522. Calculated for C<sub>23</sub>H<sub>29</sub>N<sub>8</sub> = 417.2515.

**(4); step ii.** 4-Ethynyl-[2,2']bipyridinyl (376 mg, 2.09 mmol, 1 eq) and **(5)** (871 mg, 2.09 mmol, 1 eq) were dissolved in 30 mL (1:1 CH<sub>2</sub>Cl<sub>2</sub>/H<sub>2</sub>O). The solution was purged and degassed 3 times with argon and vacuum. To this solution were added CuSO<sub>4</sub>·5H<sub>2</sub>O (783 mg, 3.13 mmol, 1.50 eq) and sodium ascorbate (1.25 g, 6.27 mmol, 3 eq). The mixture was allowed to react overnight under an argon atmosphere. At this time the reaction mixture was transferred to a round bottom flask and 20 mL of a mixture containing 1M HEDTA and 3M NaOH were added followed by mixing for one hour. The solution was extracted with CH<sub>2</sub>Cl<sub>2</sub> and the product was purified by column chromatography (Silica. CH<sub>2</sub>Cl<sub>2</sub> to CH<sub>2</sub>Cl<sub>2</sub>/5% MeOH). (0.92 g, 74% yield). <sup>1</sup>H NMR (300 MHz, CDCl<sub>3</sub>) δ 8.71 (d, 1H, J = 5.0 Hz, bpy-H); 8.68 (d, 1H, J = 4.3 Hz, bpy-H); 8.61 (s, 1H, Trz-H); 8.49 (d, 3H, J = 4.6 Hz, Py-H); 8.43 (d, 1H, J = 8 Hz, bpy-H); 7.69 (dd, 1H, J = 1.5, 5.0 Hz, bpy-H); 7.84 (s, 1H, bpy-H); 7.82 (dd, 1H, J = 2.0, 7.2 Hz, bpy-H); 7.63 (q, 3H, J = 7.2 Hz, Py-H); 7.46 (s, 1H, bpy-H); 7.43 (s, 1H, bpy-H); 7.31 (m, 2H, bpy-H); 7.10 (dd, 3H, J = 5.0, 7.2 Hz, Py-H); 4.33 (t, 2H, J = 7.2 Hz, CH<sub>2</sub>-Trz); 3.81 (s, 4H, CH<sub>2</sub>-Py); 3.65 (s, 2H, CH<sub>2</sub>-Py); 2.71 (s, 4H, N-CH<sub>2</sub>CH<sub>2</sub>-N); 2.47 (t, 2H, J = 7.0 Hz, Trz-CH<sub>2</sub>-CH<sub>2</sub>-CH<sub>2</sub>-N); 2.02 (q, 2H, J = 7.0 Hz, Trz-CH<sub>2</sub>-CH<sub>2</sub>-CH<sub>2</sub>-N). HRMS(ESI<sup>+</sup>) [M+H]<sup>+</sup> = 597.3215. Calculated for C<sub>35</sub>H<sub>37</sub>N<sub>10</sub> = 597.3203.

**(3); step iii.** Ru(bpy)<sub>2</sub>Cl<sub>2</sub> (170 mg, 0.352 mmol, 1 eq) and AgNO<sub>3</sub> (180 mg, 1.05 mmol, 3 eq) were dissolved in 5 mL MeOH and stirred at room temperature for one hour. The resulting solution was filtered through filter paper into a round bottom flask containing compound **4** (231 mg, 0.387 mmol, 1.1 eq) and the resulting mixture was allowed to react under an argon atmosphere at 70°C overnight. The solvent was evaporated under reduced pressure and the resulting solid was redissolved in a minimum amount of MeOH. The silver containing product **3** was precipitated by dropwise addition of a saturated aqueous solution of NaPF<sub>6</sub>. (457 mg, 81% yield).

<sup>1</sup>H NMR (600 MHz, CD<sub>3</sub>OCD<sub>3</sub>) δ 8.99 (s broad, 2H, Py-H & bpy-H); 8.92 (d, 1H, J = 8.1 Hz, bpy-H); 8.81 (d, 4H, J = 8.0 Hz, bpy-H); 8.52 (s broad, 3H, Py-H & Trz-H); 8.20 (m, 6H, bpy-H); 8.07 (m, 5H, bpy-H); 7.90 (dd, 1H, J = 5.9 Hz & J = 1.7 Hz, bpy-H); 7.82 (m, 3H, Py-H); 7.58 (m, 5H, bpy-H); 7.47 (d, 2H, J = 7.6 Hz, Py-H); 7.42 (m, 2H, Py-H); 7.32 (t, j = 7.0 Hz, 2H, Py-H); 4.33 (t, 2H, J = 7.0 Hz, Trz-CH<sub>2</sub>-CH<sub>2</sub>-CH<sub>2</sub>-N); 4.06 (s broad, 2H, CH<sub>2</sub>-Py); 3.82 (s broad, 2H, CH<sub>2</sub>-Py); 3.61 (s, 2H, CH<sub>2</sub>-Py); 3.01 (s broad, 2H, N-CH<sub>2</sub>-CH<sub>2</sub>-N); 2.93 (s, 2H, N-CH<sub>2</sub>-CH<sub>2</sub>-N); 2.31 (t, 2H, J = 7.2 Hz, Trz-CH<sub>2</sub>-CH<sub>2</sub>-CH<sub>2</sub>-N); 2.12 (m, 2H, Trz-CH<sub>2</sub>-CH<sub>2</sub>-CH<sub>2</sub>-N).

<sup>13</sup>C NMR (75.475 MHz, CD<sub>3</sub>OCD<sub>3</sub>) δ 158.9- 158.7 (Py-C<sub>2</sub>); 158.6-158.2 (bpy-C<sub>2</sub>); 153.0 (Py-C<sub>6</sub>H); 152.9 - 152.7 (bpy-C<sub>6</sub>H); 151.8 (Py-C<sub>6</sub>H); 143.9 (bpy-C<sub>4</sub>-Trz); 141.1 (Trz-C); 139.6 - 139.2 (Py-C<sub>5</sub>H); 139.0 (bpy-C<sub>4</sub>H); 128.8 (bpy-C<sub>5</sub>H); 126.6 -126.11 (Py-C<sub>3</sub>H); 125.6 - 125.4 (bpy-C<sub>3</sub>H); 124.8 (Trz-CH); 124.5 (Py-C<sub>4</sub>H); 123.9 (bpy-C<sub>5</sub>H-Trz); 120.7 (bpy-C<sub>3</sub>H-Trz); 60.1-59.6 (CH<sub>2</sub>-Py); 52.1-51.6 (N-CH<sub>2</sub>-CH<sub>2</sub>-N); 51.2 (Trz-CH<sub>2</sub>-CH<sub>2</sub>-CH<sub>2</sub>-N), 49.2 (Trz-CH<sub>2</sub>-CH<sub>2</sub>-CH<sub>2</sub>-N), 27.3 (Trz-CH<sub>2</sub>-CH<sub>2</sub>-CH<sub>2</sub>-N).

HRMS(ESI<sup>+</sup>) [M+PF<sub>6</sub>]<sup>2+</sup> = 632.1105. Calculated for C<sub>55</sub>H<sub>52</sub>AgF<sub>6</sub>N<sub>14</sub>PRu = 632.1120.

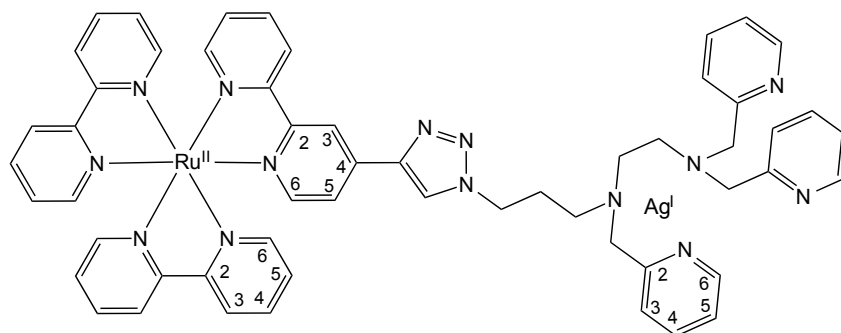

Figure SI 2. Numbering scheme of compound 3.

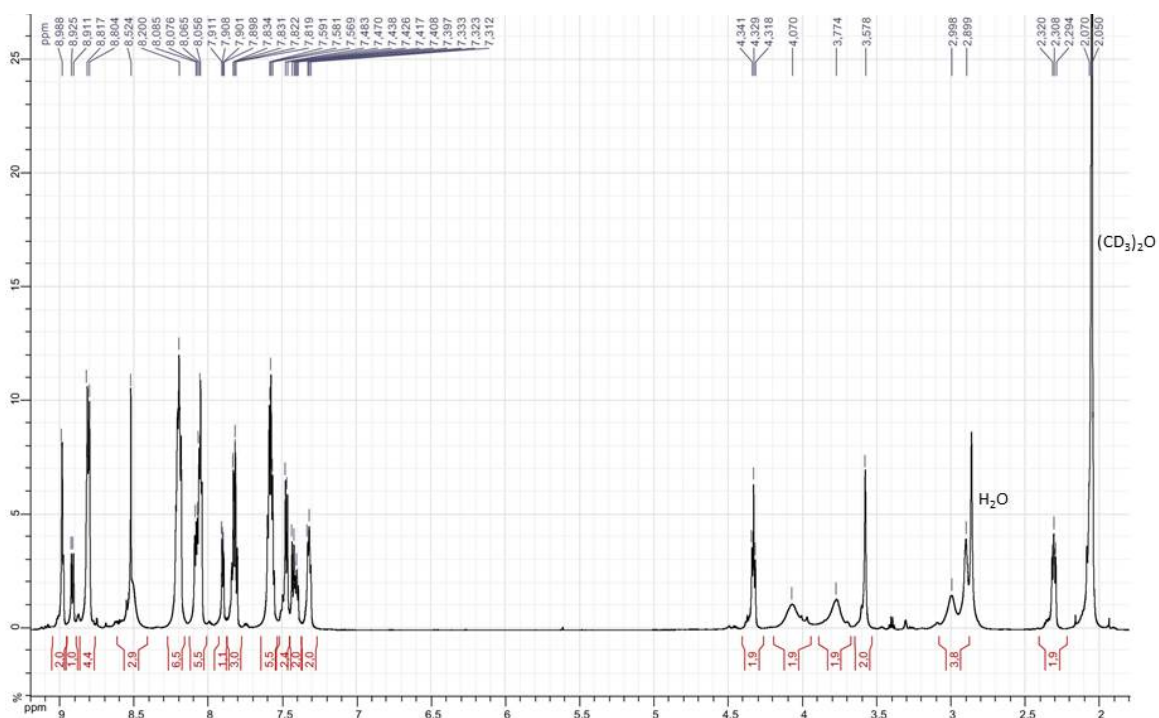

Figure SI 3. <sup>1</sup>H NMR of compound 3, 600 MHz, CD<sub>3</sub>OCD<sub>3</sub>.



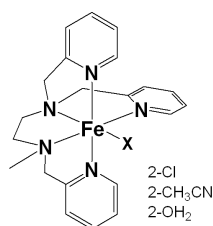

**Figure SI 5.** Structure of reference compound **2** with different ligand substitutions (X=Cl, CH<sub>3</sub>CN, H<sub>2</sub>O).

**EPR.** For X-band EPR measurements, we used a Bruker Elexsys E 500 EPR spectrometer with an Oxford ESR9 liquid helium flow cryostat using a gold-chromel thermocouple directly below the sample position. The complex was dissolved in a 4:1 (v/v) mix of water/acetonitrile, transferred to an EPR tube and frozen to 77 K. Sample concentrations were typically 1-2 mM in Ru-Fe complex and 16-20 mM in [Co<sup>III</sup>(NH<sub>3</sub>)<sub>5</sub>Cl]<sup>2+</sup>. We prepared the samples for EPR in an ethanol/ice bath, and then transferred ~100 μL into an EPR tube that was pre-cooled in an ethanol/ice bath. The EPR tube was then rapidly transferred to an ethanol bath at ~ -100°C (ethanol cooled with liquid nitrogen). The EPR tube was then pumped to vacuum 4-5 times to purge oxygen from the sample, and finally transferred into liquid nitrogen for cooling to 77 K before being entered into the EPR spectrometer.

For sample illumination with monochromatic light, we used a Thorlabs high power LED operating at 455 nm. Illuminations were performed with the sample in the EPR tube (prepared as described above). After illumination, the sample was rapidly transferred to a ~ -100°C ethanol bath for ~1-2 minutes, and then into liquid nitrogen before being transferred to the EPR spectrometer.

**Electrochemistry.** All electrochemical experiments were run under an argon atmosphere. Cyclic voltammetry measurements were recorded using an Autolab potentiostat controlled with a Nova 1.10 software package. The counter electrode used was a Pt wire and the working electrode was a glassy carbon disk carefully polished before each voltammogram with 1 μm diamond paste, sonicated in an ethanol bath, and washed with ethanol. The reference electrode used was a SCE electrode isolated from the rest of the solution by a fritted bridge. Experiments were run with 1 mM solutions of complex in acetonitrile or acetone using 0.1 M tetrabutylammonium hexafluorophosphate as supporting electrolyte.

### **Steady-state absorption and emission**

Ground state absorption spectra were measured in a Specord spectrophotometer (Analytic Jena) with 1 cm quartz cells. Steady state emission spectra were recorded in a Varian Eclipse Spectrofluorimeter. Samples were excited at 460 nm with absorbances optically matched at 0.1. [Ru(bpy)<sub>3</sub>]<sup>2+</sup> was used as reference for emission quantum yield ( $\varphi_{em}$ ) calculation in acetonitrile ( $\varphi_{em} = 0.059$ ).<sup>[2]</sup> A cut-off filter at 475 nm was put in front of the emission monochromator to avoid excitation light. Samples were purged for 10 min with argon prior to each experiment.

### **Nanosecond Laser Flash Photolysis.**

Transient absorption spectral and kinetic measurements were performed on an Edinburgh Instruments LP920 Laser Flash Photolysis Spectrometer system that incorporated a Continuum OPO

for sample excitation (~7 ns pulse duration). The OPO, was pumped by a Continuum Surelite Q-switched Nd:YAG laser operating at 355 nm. Samples were excited by 460 nm wavelength pulses at ~10 mJ laser energy. The LP920 system uses a 450 W Xenon arc lamp as source for the probe light for the transient absorption measurements. For kinetic measurements in the time range 10 ns to 100  $\mu$ s, the Xenon arc lamp was pulsed. Detection is performed either via a Czerny-Turner blazed 500 nm monochromator (bandwidth: 1-5 nm) coupled with a Hamamatsu R928 photomultiplier tube (kinetic mode), or via a 500 nm blazed spectrograph (bandwidth: 5 nm) coupled with a water-cooled ICCD nanosecond Andor DH720 camera (spectral mode). Samples, purged with argon for 10 minutes prior to each experiment, had an absorbance of ~0.40 at excitation wavelength. The presented transient absorption spectra were typically the average of 20-50 measurements. Experiments in the presence of electron acceptors were performed using either 20 mM of MV<sup>2+</sup> or [Ru<sup>III</sup>(NH<sub>3</sub>)<sub>6</sub>]<sup>3+</sup>. A circulating system, equipped with a 2 mm path length cuvette was employed to study the second photoinduced electron transfer.

**Catalysis.** In a typical catalytic experiment Ru-Fe complex **1-Cl** dissolved in acetonitrile (200  $\mu$ L), [Co<sup>III</sup>(NH<sub>3</sub>)<sub>5</sub>Cl]<sup>2+</sup> dissolved in 50 mM acetate buffer pH 5 (800  $\mu$ L), and triphenyl phosphine dissolved in methylene chloride (180  $\mu$ L) were mixed in a 2 mL vial equipped with a magnetic stirrer and a septum cap. The final concentrations of each species were 0.5 mM complex, 14 mM acceptor and 83 mM substrate in a 4:1 water:acetonitrile mixture. The solution was purged with argon for 5 min and then subjected to illumination for the determined amount of time. The solutions were extracted with 2 mL CH<sub>2</sub>Cl<sub>2</sub> and dried with sodium sulfate before being injected in the GC for analysis. <sup>18</sup>O insertion in triphenyl phosphine was done by adding 200  $\mu$ L 95.4% H<sub>2</sub><sup>18</sup>O to the solution described above. This results in 16 % <sup>18</sup>O in the final solution.

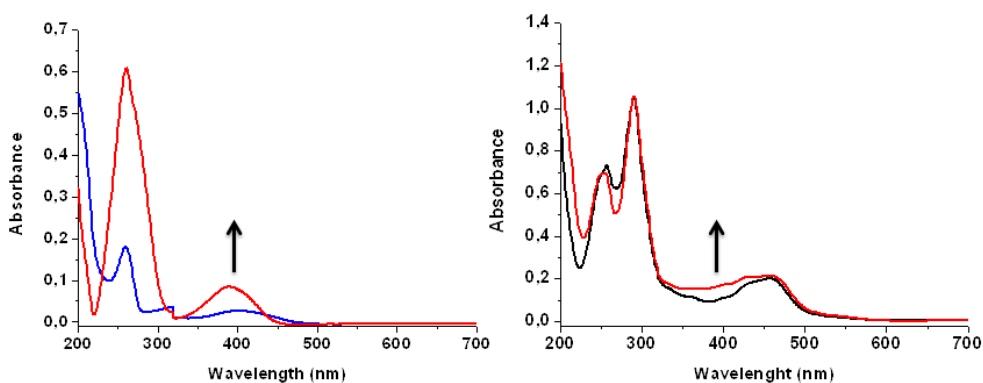

**Figure SI 6.** Left: UV/Vis absorption spectra of reference complex **2-Cl** in acetonitrile (blue) and in a 4:1 water:acetonitrile mixture (red). Right: UV/Vis absorption spectra of complex **1-Cl** in acetonitrile (black) and in a 4:1 water:acetonitrile mixture (red).

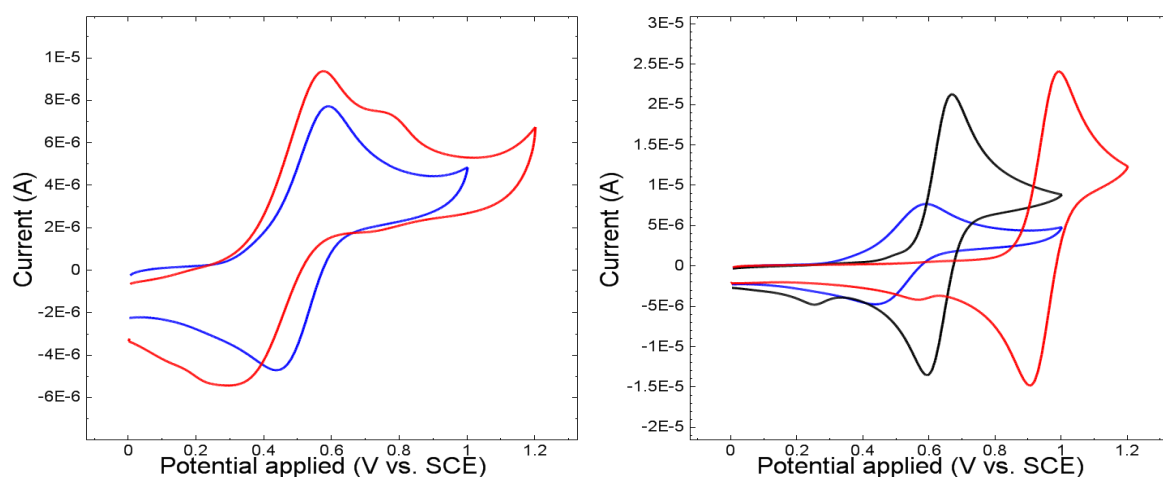

**Figure SI 7.** Left: Cyclic voltammety of compounds **2-OH<sub>2</sub>** (blue) in acetone and **2-Cl** (red) in a 4:1 H<sub>2</sub>O:CH<sub>3</sub>CN solution. Scan speed 100 mV.sec<sup>-1</sup>. Right: Cyclic voltammety of compounds **2-Cl** (black), **2-CH<sub>3</sub>CN** (red), and **2-OH<sub>2</sub>** (blue) in acetone. Compound **2-CH<sub>3</sub>CN** was obtained by addition of 1.5 eq. silver triflate in acetonitrile to a solution of **2-Cl** in acetone. **2-OH<sub>2</sub>** was obtained by addition of 1.5 eq. silver triflate in water to a solution of **2-Cl** in acetone. Scan speed 100 mV.sec<sup>-1</sup>.

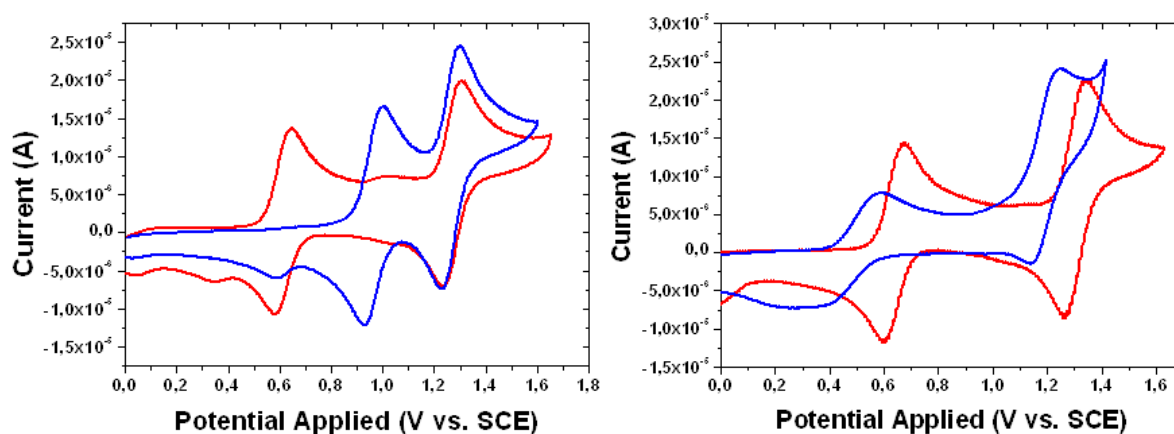

**Figure SI 8.** Left: Cyclic voltammety of compounds **1-Cl** (red) and **1-CH<sub>3</sub>CN** (blue) in acetonitrile. Scan speed 100 mV.sec<sup>-1</sup>. Right: Cyclic voltammety of compounds **1-Cl** (red) in acetonitrile and **1-OH<sub>2</sub>** (blue) in 3:1 acetone:water. Scan speed 100 mV.sec<sup>-1</sup>.



**Table SI 1.** Electrochemical data (V vs. SCE) for complexes **1** and **2**. Experimental conditions as described in Figure SI 8.

|           | Fe <sup>III</sup> /Fe <sup>II</sup> |                          |                          | Ru <sup>III</sup> /Ru <sup>II</sup> |
|-----------|-------------------------------------|--------------------------|--------------------------|-------------------------------------|
|           | 1-Cl                                | 1-CH <sub>3</sub> CN     | 1-OH <sub>2</sub>        | 1-X                                 |
| $E_{1/2}$ | 0.60 (0.63) <sup>a</sup>            | 0.97 (0.97) <sup>a</sup> | 0.50 (0.51) <sup>a</sup> | 1.26 <sup>b</sup>                   |

a) Values given in bracket are those for **2-X**. b) The potential of the Ru<sup>III</sup>/Ru<sup>II</sup> wave for **1-OH<sub>2</sub>** is slightly modified in 3:1 acetone/ water. The shape is modified as well due to the onset of the oxidation of the solvent mixture in this case.

Based on these electrochemical values of complexes **1**, oxidation of the Fe<sup>II</sup> unit by the photogenerated Ru<sup>III</sup> center is exergonic by either 290, 660, or 750 mV depending on whether the exogenous ligand is acetonitrile, chloride or water, respectively. Furthermore, this observation rules out the possibility of an electron transfer mechanism from the catalyst to the excited state of the chromophore being responsible for the quenching of the ruthenium excited state (\*Ru<sup>II</sup>), which was identical for **1-Cl**, **1-CH<sub>3</sub>CN**, and **1-OH<sub>2</sub>**. Indeed, the oxidation potential of the chromophore excited state  $E_{1/2}(*\text{Ru}^{\text{II}}/\text{Ru}) = 0.80 \text{ V vs SCE}^{[1]}$  should be able to oxidize the Fe<sup>II</sup>(Cl) and Fe<sup>II</sup>(OH<sub>2</sub>) units ( $\Delta E = +200$  and  $+300 \text{ mV}$ ) but not its acetonitrile counterpart ( $\Delta E = -170 \text{ mV}$ ).

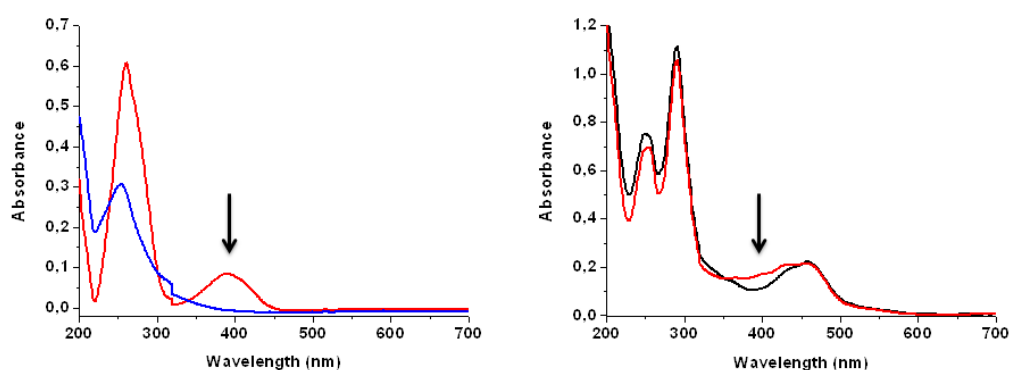

**Figure SI 9.** Left: UV/Vis absorption spectra of reference complex **2-OH<sub>2</sub>** in a 4:1 water:acetonitrile mixture before (red) and after (blue) addition of 2 eq. H<sub>2</sub>O<sub>2</sub>. Right: UV/Vis absorption spectra of complex **1-OH<sub>2</sub>** in a 4:1 water:acetonitrile mixture before (red) and after (black) addition of 2 eq. H<sub>2</sub>O<sub>2</sub>.

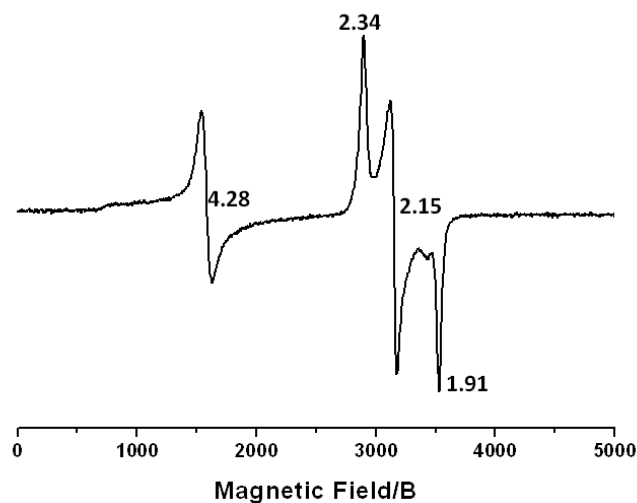

**Figure SI 10.** X-band EPR spectrum of complex **2-OH<sub>2</sub>** in a 4:1 H<sub>2</sub>O:CH<sub>3</sub>CN solvent mixture after addition of 2 eq. H<sub>2</sub>O<sub>2</sub>. The weak resonance at  $g = 4.28$  is due to ubiquitous  $S=5/2$  Fe<sup>III</sup> species.

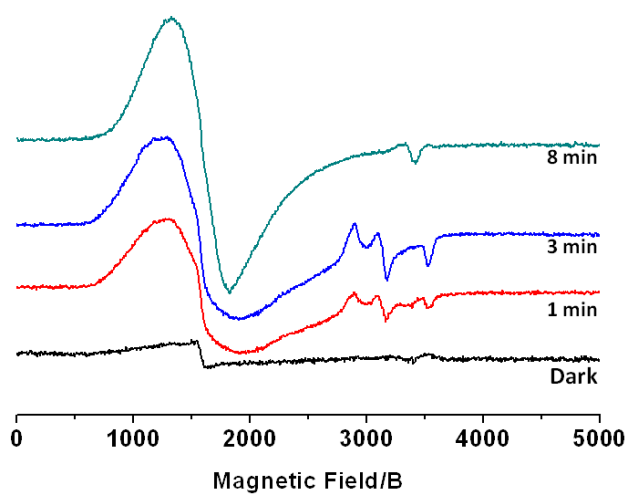

**Figure SI 11.** X-band EPR signal of a mixture of 0.9 mM complex **1-OH<sub>2</sub>** and 16.5 mM [Co<sup>III</sup>(NH<sub>3</sub>)<sub>5</sub>Cl]<sup>2+</sup> in a 4:1 H<sub>2</sub>O:CH<sub>3</sub>CN solvent mixture after illumination with 455 nm light at  $t = 0$  (black), 1 min (red), 3 min (blue), 8 min (green). Mw freq 9.49 GHz, mw power 0.40 mW,  $T = 5$  K, 5 scans.

Flash photolysis experiments of  $\text{Ru}^{\text{II}}\text{-Fe}^{\text{III}}(\text{OH})$  (prepared with  $\text{H}_2\text{O}_2$ ) in presence of  $\text{MV}^{2+}$  was investigated in a circulating system in order to avoid accumulation of different oxidation states of the complexes during data acquisition. The light-induced charge separated state  $\text{EA}^- + \text{Ru}^{\text{III}}\text{-Fe}^{\text{III}}$  (Eq. 5) was attained as shown by the loss of absorption at 450 nm due to formation of  $\text{Ru}^{\text{III}}\text{-Fe}^{\text{III}}$  and formation of absorption at 605 nm due to  $\text{MV}^{\bullet+}$ . However, oxidation of  $\text{Fe}^{\text{III}}$  to  $\text{Fe}^{\text{IV}}$  could not be observed due to the competition between this reaction (Eq. 6) and the recombination pathway given by (Eq. 8). This latter pathway is significantly faster than the recombination pathway between the reduced EA and the oxidized chromophore (Eq. 9) since the initial species  $\text{Ru}^{\text{II}}\text{-Fe}^{\text{III}}(\text{OH})$  is in large excess ( $\sim 20 \mu\text{M}$ ) as compared to the concentration ( $< 1 \mu\text{M}$ ) of  $\text{Ru}^{\text{III}}\text{-Fe}^{\text{III}}(\text{OH})$  formed by laser flash excitation. This is evidenced by the observation that  $\text{MV}^{\bullet+}$  (605 nm) disappears faster than  $\text{Ru}^{\text{III}}$  (450 nm) (Fig. SI 12) due to reaction (8), prevailing over reaction (6).

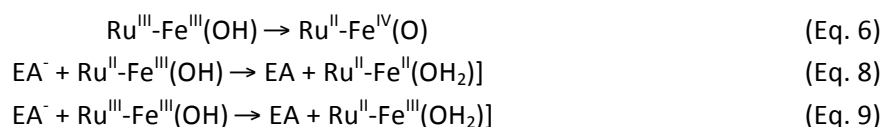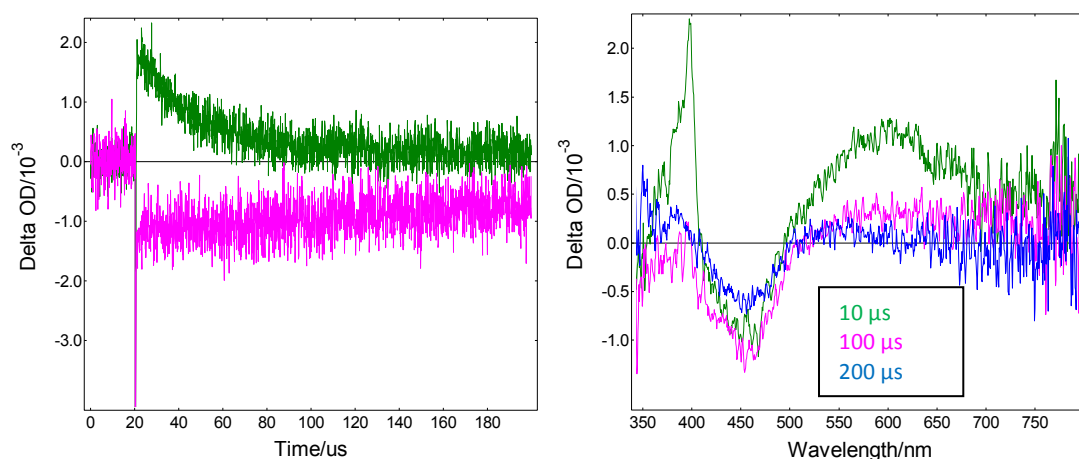

**Figure SI 12.** Flash photolysis of  $\text{Ru}^{\text{II}}\text{-Fe}^{\text{III}}\text{-OH}$ , prepared by chemical oxidation of  $\mathbf{1-OH}_2$  with 2 eq.  $\text{H}_2\text{O}_2$ , in presence of 20 mM methyl viologen. Left) decay of  $\text{MV}^{\bullet+}$  to  $\text{MV}^{2+}$  followed at 605 nm (green trace); recovery of  $\text{Ru}^{2+}$  from  $\text{Ru}^{3+}$  monitored at 450 nm (pink trace). Right) Transient absorption spectra of  $\mathbf{1-OH}_2$  recorded at 10, 100, and 200  $\mu\text{s}$  after laser flash excitation.

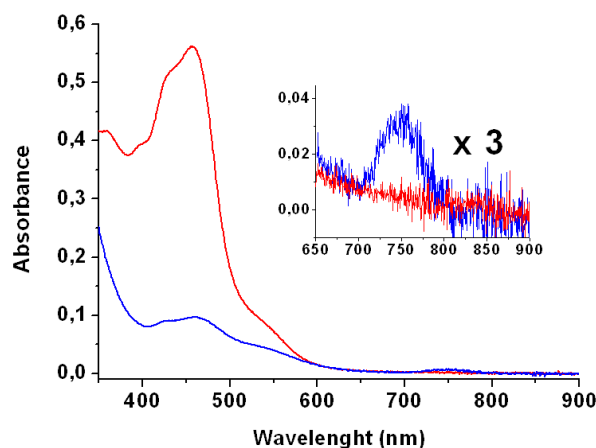

**Figure SI 13.** UV/Vis spectra of a solution containing 34  $\mu\text{M}$  **1-OH<sub>2</sub>** and 400  $\mu\text{M}$   $[\text{Co}^{\text{III}}(\text{NH}_3)_5\text{Cl}]^{2+}$  before (red) and after (blue) illumination with 450 nm light.

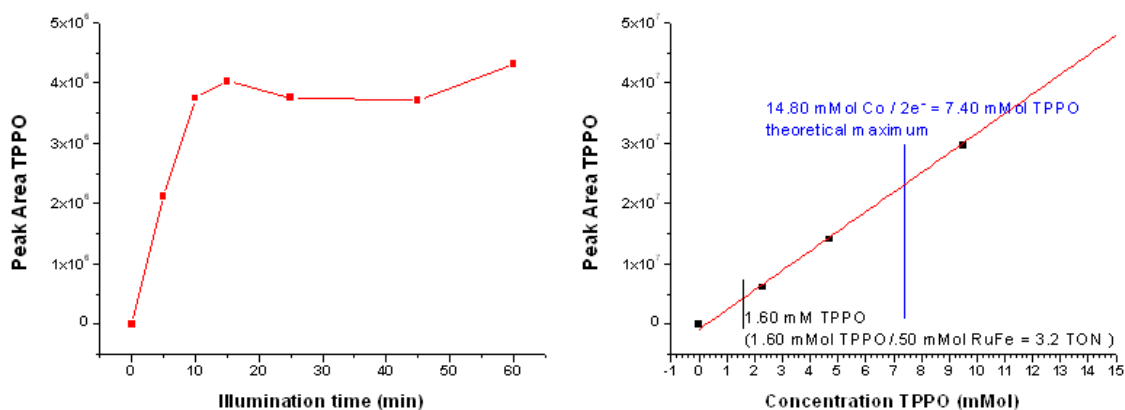

**Figure SI 14.** Left) Time profile of the photocatalytic reaction as described in the Experimental Section. Right) Calibration curve for triphenylphosphine oxide (TPPO). Black line indicates maximum amount of triphenylphosphine oxide obtained during photocatalysis after 10 min irradiation. Blue line indicates maximum theoretical yield for triphenylphosphine oxide production based on concentration of electron acceptor.

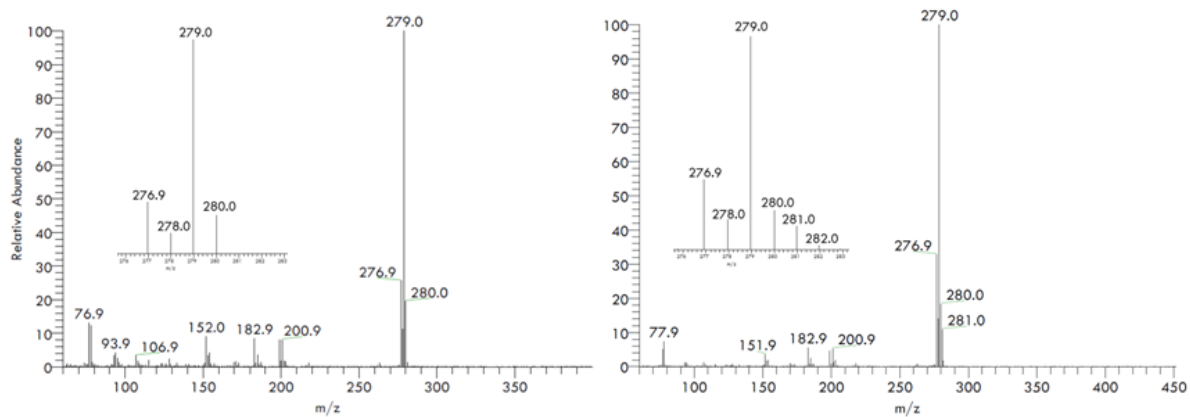

**Figure SI 15.** MS of the peak corresponding to the triphenylphosphine oxide (TPPO) product produced in H<sub>2</sub>O (left) and with 16 % H<sub>2</sub><sup>18</sup>O (right) with m/z = 279 corresponding to [TPPO+H]<sup>+</sup> and m/z = 281 corresponding to [TPP<sup>18</sup>O + H]. TPP<sup>18</sup>O obtained corresponds to > 12 % of total product.

- [1] Bernal, I.; Jensen, I. M.; Jensen, K. B.; McKenzie, C. J.; Toftlund, H.; Tuchagues, J. P. *J. Chem. Soc., Dalton Trans.* **1995**, 3667.
- [2] A. Juris, V. Balzani, F. Barigelletti, S. Campagna, P. Belser, A. Vonzelewsky, *Coord. Chem. Rev.* **1988**, 84, 85-277.
